# Supplementary figures and images for: Boron induced structure modifications in Pd–Cu–B system: new Ti2Ni-type derivative borides Pd3Cu3B and Pd5Cu5B2
Source: Royal Society of Chemistry journal article supplement (doi:10.1039/c5dt05058h), 2016-01-01

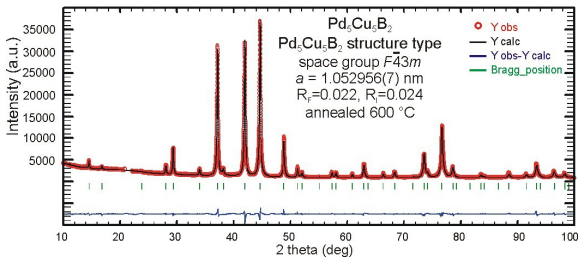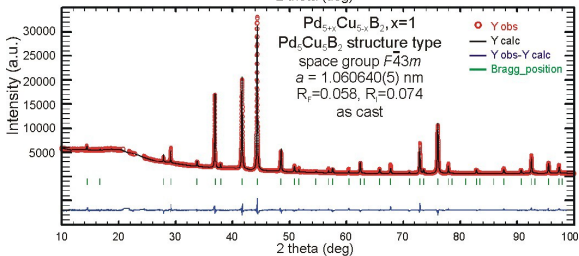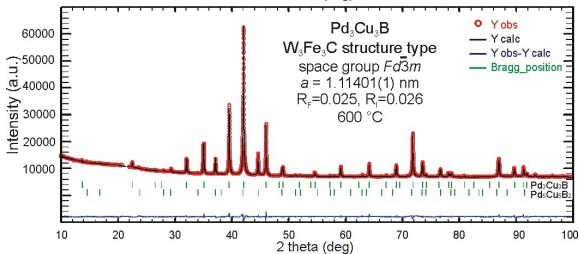

Supplement: c5dt05058h1.pdf [file c5dt05058h1.pdf]
